# Supplementary material
Source: publisher figshare collection journal article supplement (https://sage.figshare.com/ndownloader/files/13569695)
Supplement: Supplementary file 1 [file 13569695]

## SUPPLEMENTARY MATERIAL 2: INITIAL SNOWBALL SURVEY RECIPIENTS

Through previous research projects there were established links with members of three groups with expertise in visual problems. These groups were:

- Scottish Vision and Stroke Network. A voluntary network, comprising representatives from the NHS, social care, universities and charities with expertise and interest in post-stroke visual problems. Approximately 29 members.
- Stroke Rehabilitation Research group. A Glasgow Caledonian University based group, including both academics and clinicians with a stroke specialism. Approximately 33 members.
- Department of Vision Sciences (staff). A Glasgow Caledonian University teaching department, whose staff include researchers, academics and practicing vision-care professionals. Approximately 24 members.

These groups provided at least one representative of all relevant professional groups, covered all mainland Scottish NHS Health Boards (11/14 in total) and all the chief care settings. It also included charity representatives with links to carers and clinicians throughout Scotland.
